# Supplementary material for: Enhanced carbohydrate structural selectivity in ion mobility-mass spectrometry analyses by boronic acid derivatization
Source: Royal Society of Chemistry journal article supplement (doi:10.1039/b810421b), 2008-01-01
Supplement: b810421b.pdf [file b810421b.pdf]

**Supporting Information**

**Enhanced Carbohydrate Structural Selectivity in Ion Mobility-Mass Spectrometry  
Analyses by Boronic Acid Derivatization**

**Larissa S. Fenn and John A. McLean\***

Department of Chemistry and Vanderbilt Institute of Chemical Biology,  
Vanderbilt University, Nashville, TN 37235  
Email: john.a.mclean@vanderbilt.edu

**Abstract:** Boronic acid derivatization of carbohydrates and glycans is demonstrated as an ion mobility shift strategy to improve confidence in the identification and characterization of carbohydrate assignments using ion mobility-mass spectrometry.

**Table S1.** Common names, systematic names, average molecular weights, and derivatized mass of the carbohydrates reported in this work.

| Common name<br>or<br>abbreviation | Systematic name                                                                                                                                                                            | Molecular<br>weight<br>( $M_r$ , Da) | [M+ Na] <sup>+</sup><br>(Da) | [M+FBA+Na] <sup>+</sup><br>(Da) | [M+PBA+Na] <sup>+</sup><br>(Da) |
|-----------------------------------|--------------------------------------------------------------------------------------------------------------------------------------------------------------------------------------------|--------------------------------------|------------------------------|---------------------------------|---------------------------------|
| Maltose                           | 4-O- $\alpha$ -D-Glucose-D-glucose                                                                                                                                                         | 342.3                                | 365.3                        | 559.1                           | 641.5                           |
| Lactose                           | $\beta$ -D-galactose-(1 $\rightarrow$ 4)- $\alpha$ -D-glucose                                                                                                                              | 342.3                                | 365.3                        | 559.1                           | 641.5                           |
| LN                                | $\beta$ -D-Galactose-(1 $\rightarrow$ 4)-D-N-acetylglucosamine                                                                                                                             | 383.4                                | 383.4                        | 600.2                           | 682.5                           |
| Gala3-type1                       | Galactose- $\alpha$ -(1 $\rightarrow$ 3)-galactose- $\beta$ -(1 $\rightarrow$ 3)-N-acetylglucosamine- $\beta$ -azide                                                                       | 614.6                                | 637.6                        | 831.4                           | 913.7                           |
| P1                                | Galactose- $\alpha$ -(1 $\rightarrow$ 4)-galactose- $\beta$ -(1 $\rightarrow$ 4)-N-acetylglucosamine- $\beta$ -azide                                                                       | 614.6                                | 637.6                        | 831.4                           | 913.7                           |
| Lec-Lec                           | Galactose- $\beta$ -(1 $\rightarrow$ 3)-N-acetylglucosamine- $\beta$ -(1 $\rightarrow$ 3)-galactose- $\beta$ -(1 $\rightarrow$ 3)-N-acetylglucosamine- $\beta$ -azide                      | 817.8                                | 840.8                        | 1034.6                          | 1116.9                          |
| LNT                               | Galactose- $\beta$ -(1 $\rightarrow$ 3)-N-acetylglucosamine- $\beta$ -(1 $\rightarrow$ 3)-galactose- $\beta$ -(1 $\rightarrow$ 4)-N-acetylglucosamine- $\beta$ -azide                      | 817.8                                | 840.8                        | 1034.6                          | 1116.9                          |
| LNFP1                             | $\alpha$ -L-fucose-(1 $\rightarrow$ 2)- $\beta$ -D-galactose-(1 $\rightarrow$ 3)- $\beta$ -D-N-acetylglucosamine-(1 $\rightarrow$ 3)- $\beta$ -D-galactose-(1 $\rightarrow$ 4)-D-glucose   | 853.8                                | 876.8                        | 1070.6                          | 1152.9                          |
| LNFP2                             | $\beta$ -D-Galactose-(1 $\rightarrow$ 3)-( $\alpha$ -L-fucose-[1 $\rightarrow$ 4])- $\beta$ -D-N-acetylglucosamine-(1 $\rightarrow$ 3)- $\beta$ -D-galactose-(1 $\rightarrow$ 4)-D-glucose | 853.8                                | 876.8                        | 1070.6                          | 1152.9                          |

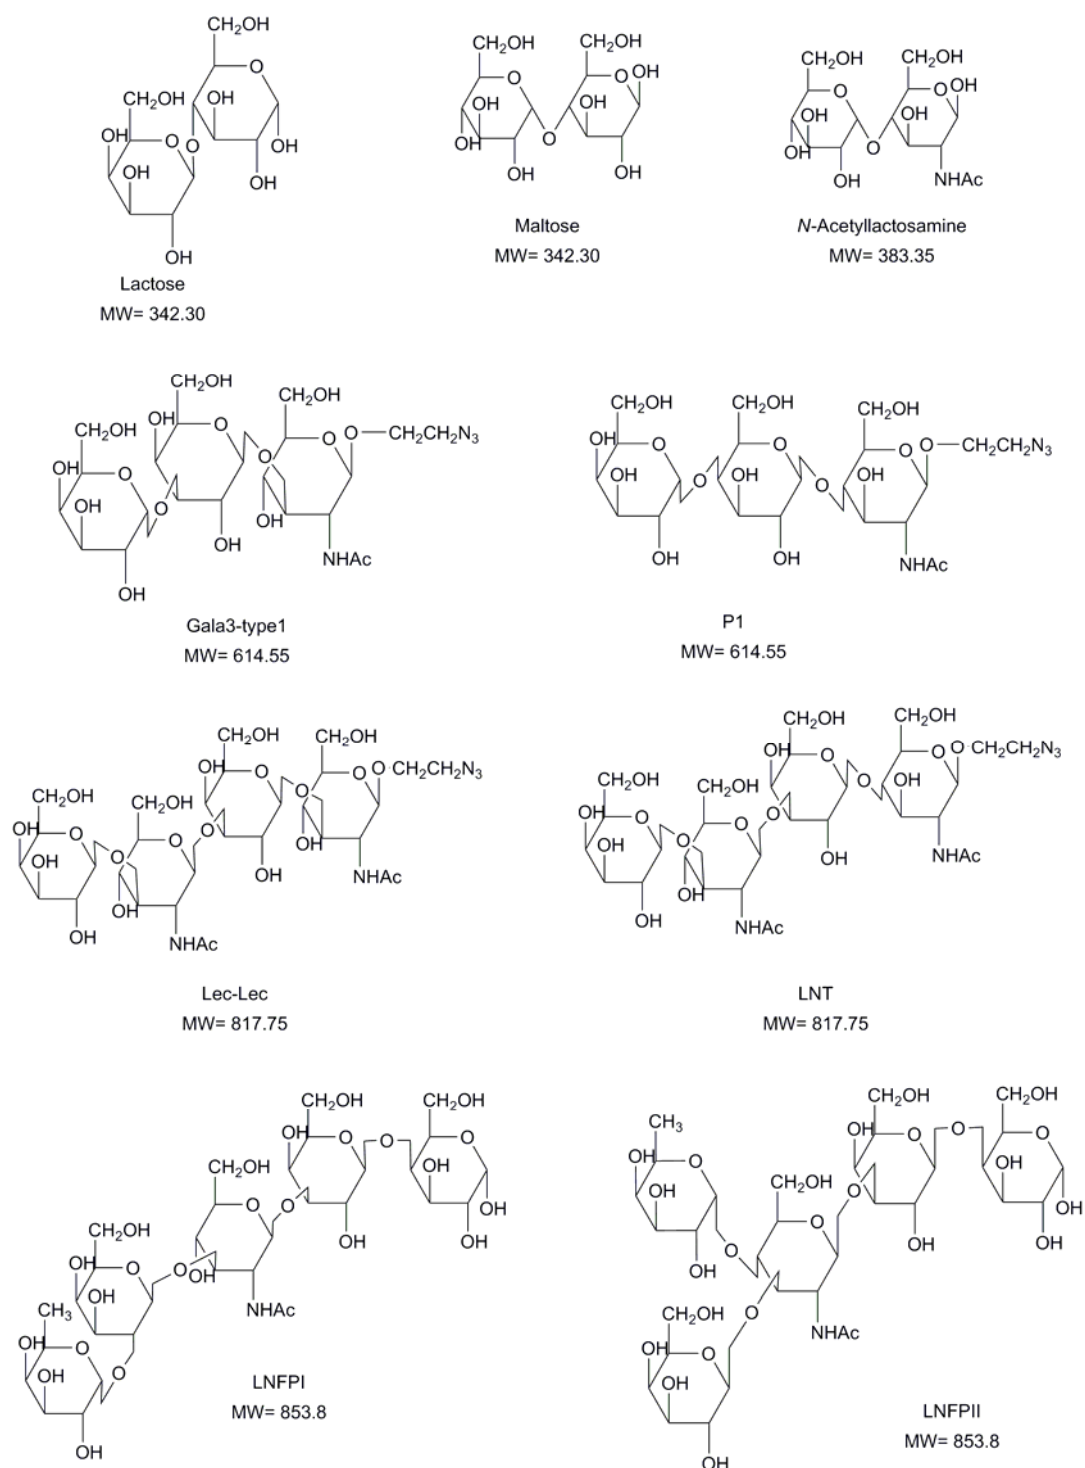

**Figure S1** Structures of the underivatized carbohydrates studied.

**Table S2** Collision cross sections determined for protonated and/or sodium coordinated carbohydrates prior to and following boronic acid derivatization.

| Carbohydrate | Collision cross section ( $\text{\AA}^2$ ) <sup>a</sup> |                                     |                                     |
|--------------|---------------------------------------------------------|-------------------------------------|-------------------------------------|
|              | $[\text{M}+\text{Na}]^+$                                | $[\text{M}+\text{FBA}+\text{Na}]^+$ | $[\text{M}+\text{PBA}+\text{Na}]^+$ |
| Maltose      | 103.1 ± 4.1 (21)                                        | 140.3 ± 7.7 (5)                     | 156.3 ± 5.7 (16)                    |
| Lactose      | 106.8 ± 5.1 (35)                                        | 151.5 ± 8.4 (16)                    | 163.7 ± 3.4 (30)                    |
| LN           | 117.4 ± 1.8 (23)                                        | 156.7 ± 3.4 (15)                    | 195.0 ± 1.5 (30)                    |
| Gala3-type1  | 160.2 ± 2.1 (26)                                        | 197.9 ± 4.4 (31)                    | 229.8 ± 7.3 (18)                    |
| P1           | 166.9 ± 1.2 (70)                                        | 200.5 ± 2.8 (39)                    | 255.4 ± 2.3 (40)                    |
| Lec-Lec      | 183.2 ± 1.6 (51)                                        | 220.0 ± 2.6 (15)                    | 252.2 ± 2.1 (21)                    |
| LNT          | 195.9 ± 1.4 (42)                                        | 217.9 ± 2.8 (19)                    | 254.8 ± 8.3 (19)                    |
| LNFP1        | 204.3 ± 1.4 (147)                                       | 222.5 ± 3.4 (9)                     | 230.2 ± 6.1 (26)                    |
| LNFP2        | 201.4 ± 1.0 (166)                                       | 226.1 ± 2.3 (11)                    | 233.7 ± 3.1 (21)                    |

*a.* Error represents  $\pm 1\sigma$  for  $n$  measurements indicated in parenthesis. The protonated form of PBA derivatized carbohydrates is not included as the relative abundance for  $[\text{M}+\text{PBA}+\text{H}]^+$  species was <2% of the base peak ( $[\text{M}+\text{PBA}+\text{Na}]^+$ ) in the spectra.
